# Supplementary material for: Taxonomic and functional diversity of cultured seed associated microbes of the cucurbit family
Source: PubMed Central journal article supplement (PMC4924336; doi:10.1186/s12866-016-0743-2), 2016-06-27
Supplement: 12866_2016_743_MOESM2_ESM.pdf [file 12866_2016_743_MOESM2_ESM.pdf]

- Cucumber
- Melon, Cantaloupe
- Pumpkin
- Watermelon
- Squash
- Angled luffa
- Bottle gourd

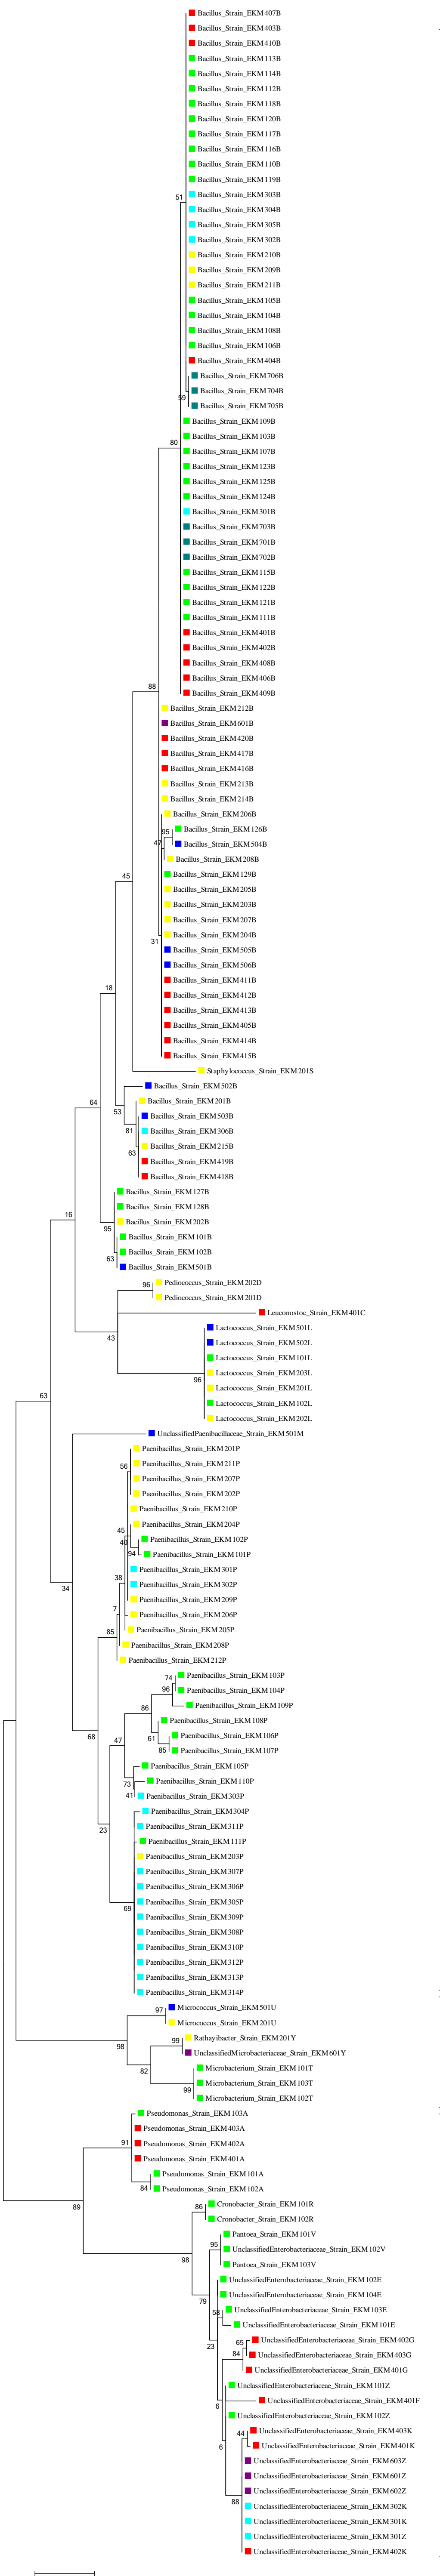

Bacilli

Actinomycetales

$\gamma$ -Proteobacteria

0.05
